# Supplementary material for: Nestin Expression Is Associated with Relapses in Head and Neck Lesions
Source: MDPI journal article supplement (doi:10.3390/diagnostics11040583), 2021-03-24
Supplement: s1 [file s1]

# Nestin Expression Is Associated with Relapses in Head and Neck Lesions

Mario Pérez-Sayáns <sup>1,2\*</sup>, Cintia M Chamorro-Petronacci <sup>2</sup>, Fátima Baltazar <sup>3</sup>, Fabio Ramoa Pires <sup>4</sup>, Ángel Insua <sup>5</sup>, Juan A Suárez-Quintanilla <sup>6</sup> and José M Suárez-Peñaranda <sup>7</sup>

- <sup>1</sup> Oral Medicine, Oral Surgery and Implantology Unit (MedOralRes), Faculty of Medicine and Dentistry, Universidade de Santiago de Compostela, 15782 Santiago de Compostela, Spain
  - <sup>2</sup> Research Institute of Santiago de Compostela (IDIS), 15706 Santiago de Compostela, Spain; cintiamica.chamo@yahoo.es
  - <sup>3</sup> Life and Health Science Research Institute (ICVS), School of Medicine University of Minho, 4710-057 Braga, Portugal; fbaltazar@med.uminho.pt
  - <sup>4</sup> Post-graduation Program in Dentistry, Department of Oral Pathology, Estácio de Sá University, State University of Rio de Janeiro, Rio de Janeiro 22631-000, Brazil; ramoafop@yahoo.com
  - <sup>5</sup> Department of Periodontics and Oral Medicine, University of Michigan, Ann Arbor, MI 48109-1078, USA; angel\_insua@yahoo.es
  - <sup>6</sup> Area of Human Anatomy and Embryology, Faculty of Medicine and Dentistry. University of Santiago de Compostela, 15782 Santiago de Compostela, Spain; juanantonisuarez.suarez@usc.es
  - <sup>7</sup> Pathological Anatomy Service, University Hospital Complex of Santiago (CHUS), Santiago de Compostela, 15706 Santiago de Compostela, Spain; jm.suarez.penaranda@gmail.com.
- \* Correspondence: perezsayans@gmail.com; Tel.: +34 626233504

**Citation:** Pérez-Sayáns, M.; Chamorro-Petronacci, C.; Baltazar, F.; Pires, F.R.; Insua, Á.; Suárez-Quintanilla, J.A.; Suárez-Peñaranda, J.M. Nestin Expression Is Associated with Relapses in Head and Neck Lesions. *Diagnostics* **2021**, *11*, 583. <https://doi.org/10.3390/diagnostics11040583>

Academic Editor: Maciej Misiolek

Received: 10 February 2021

Accepted: 21 March 2021

Published: 24 March 2021

**Publisher's Note:** MDPI stays neutral with regard to jurisdictional claims in published maps and institutional affiliations.

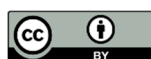

**Copyright:** © 2021 by the authors. Licensee MDPI, Basel, Switzerland. This article is an open access article distributed under the terms and conditions of the Creative Commons Attribution (CC BY) license (<http://creativecommons.org/licenses/by/4.0/>).

## Tumor subtypes

Mucoepidermoid carcinoma: 8 (9.08%)  
Adenoid cystic carcinoma: 6 (6.81%)  
Warthin tumor: 4 (4.54%)  
Squamous cell carcinoma: 15 (17.04%)  
Polyp: 13 (14.77%)  
Inverted papilloma: 13 (14.77%)  
Inverted papilloma with atypia: 1 (1.13%)  
Pleomorphic adenoma: 7 (7.95%)  
Parotid squamous cell carcinoma: 1 (1.13%)  
Mucosecretory adenoma: 1 (1.13%)  
Moderately differentiated adenocarcinoma: 3 (3.4%)  
Well-differentiated adenocarcinoma: 1 (1.13%)  
Well-differentiated mucinous adenocarcinoma, enteric type: 1 (1.13%)  
Moderately differentiated mucinous adenocarcinoma: 2 (2.27%)  
Undifferentiated carcinoma trabecular pattern: 1 (1.13%)  
Undifferentiated sinonasal carcinoma: 1 (1.13%)  
Poorly differentiated adeno squamous carcinoma: 2 (2.27%)  
Epithelial-myoepithelial carcinoma: 1 (1.13%)  
Large B-cell lymphoma: 1 (1.13%)  
Hodgkin lymphoma: 2 (2.27%)  
Salivary duct carcinoma: 2 (2.27%)  
Small cell carcinoma: 1 (1.13%)  
Acinic cell carcinoma: 1 (1.13%)
